# Supplementary material for: Surface modification of a hole transporting layer for an efficient perovskite solar cell with an enhanced fill factor and stability
Source: Royal Society of Chemistry journal article supplement (doi:10.1039/c8me00036k), 2018-01-01
Supplement: c8me00036k1.pdf [file c8me00036k1.pdf]

## Supporting information

# Surface Modification of Hole Transporting Layer for Efficient Perovskite Solar Cell with Enhanced Fill Factor and Stability

Mohammad Mahdi Tavakoli<sup>1,2\*</sup>, Rouhollah Tavakoli<sup>1</sup>, Daniel Prochowicz<sup>3</sup>, Pankaj Yadav<sup>4</sup>,  
Michael Saliba<sup>5\*</sup>

<sup>1</sup>*Department of Materials Science and Engineering, Sharif University of Technology, 14588  
Tehran, Iran.*

<sup>2</sup>*Department of Electrical Engineering and Computer Science, Massachusetts Institute of  
Technology, Cambridge, MA, USA*

<sup>3</sup>*Institute of Physical Chemistry, Polish Academy of Sciences, Kasprzaka 44/52, 01-224 Warsaw, Poland*

<sup>4</sup>*Department of Solar Energy, School of Technology, Pandit Deendayal Petroleum University,  
Gandhinagar-382 007, Gujarat, India*

<sup>5</sup>*Adolphe Merkle Institute, Chemins des Verdiers 4, CH-1700 Fribourg*

\* Corresponding authors: [mtavakol@mit.edu](mailto:mtavakol@mit.edu); [michael.saliba@unifr.ch](mailto:michael.saliba@unifr.ch)

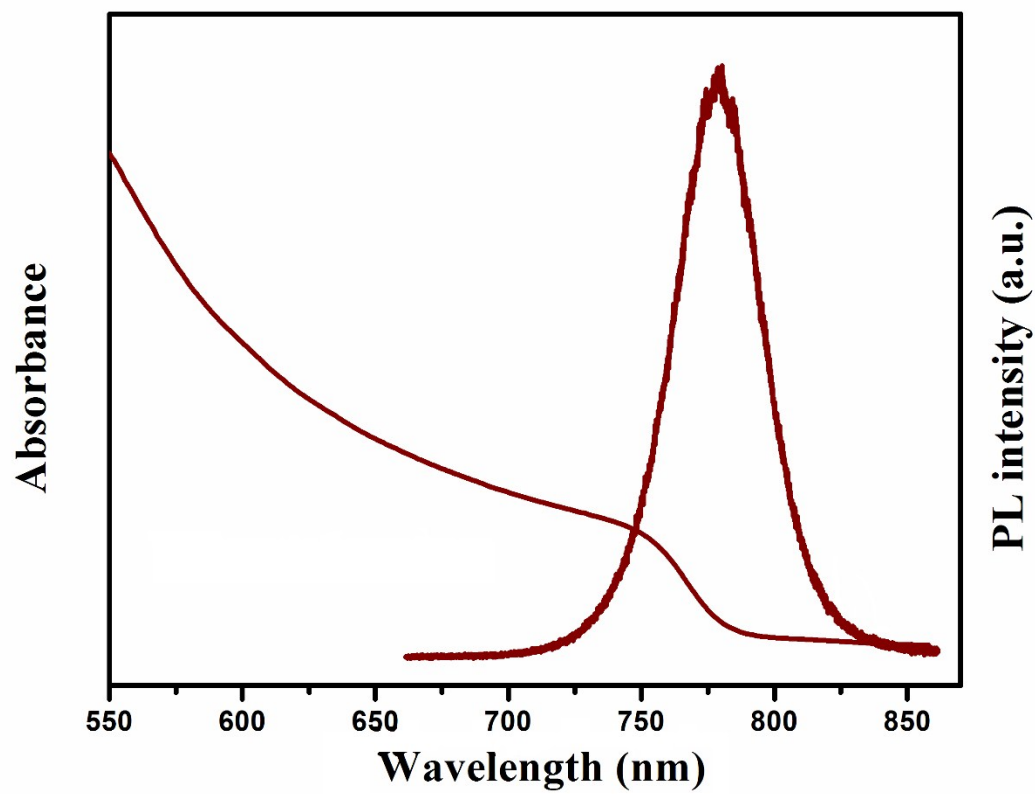

**Figure S1.** UV-visible and photoluminescence spectra of a representative MAPbI<sub>3</sub> perovskite film.

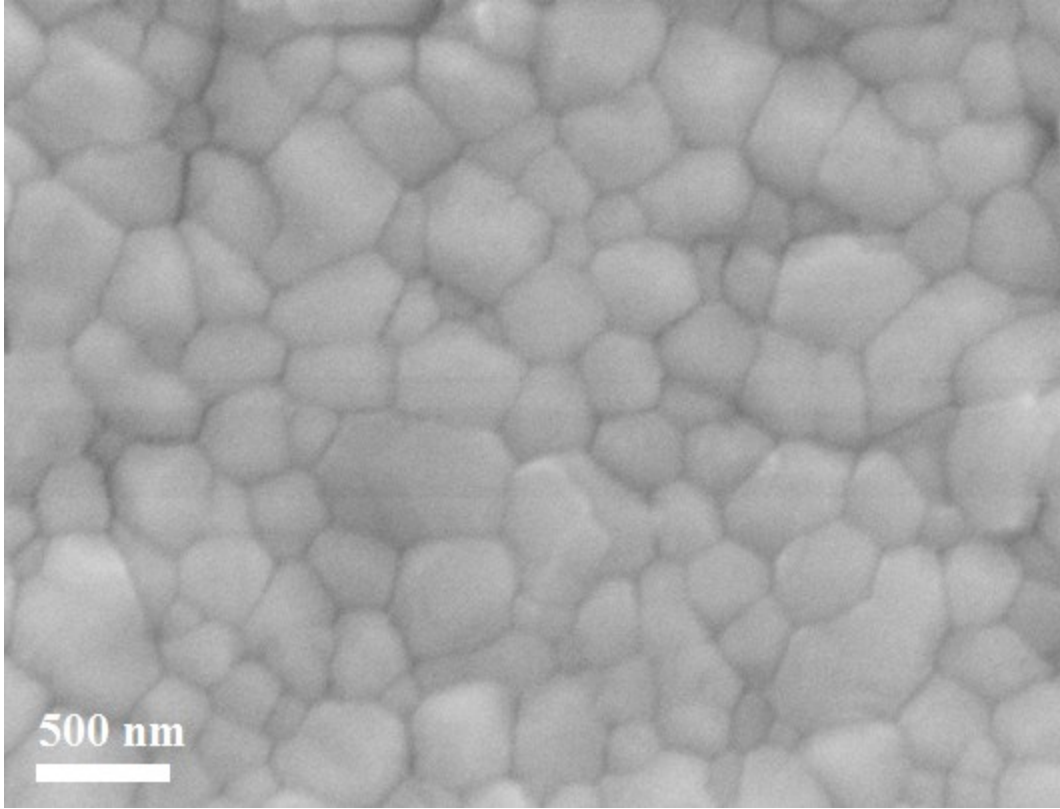

**Figure S2.** Top-view SEM image of a typical MAPbI<sub>3</sub> perovskite film.

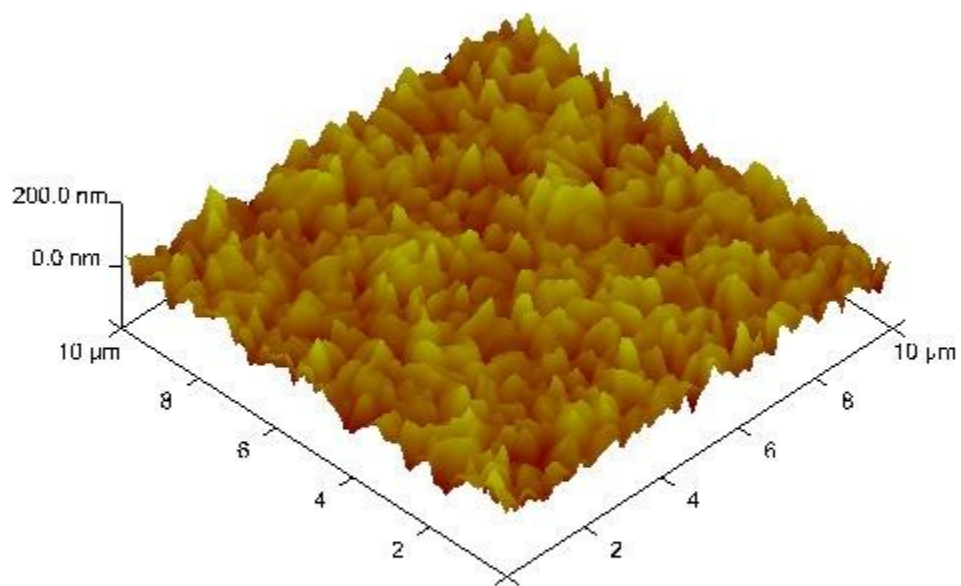

Figure S3. Three-dimensional image of perovskite film fabricated by anti-solvent technique.

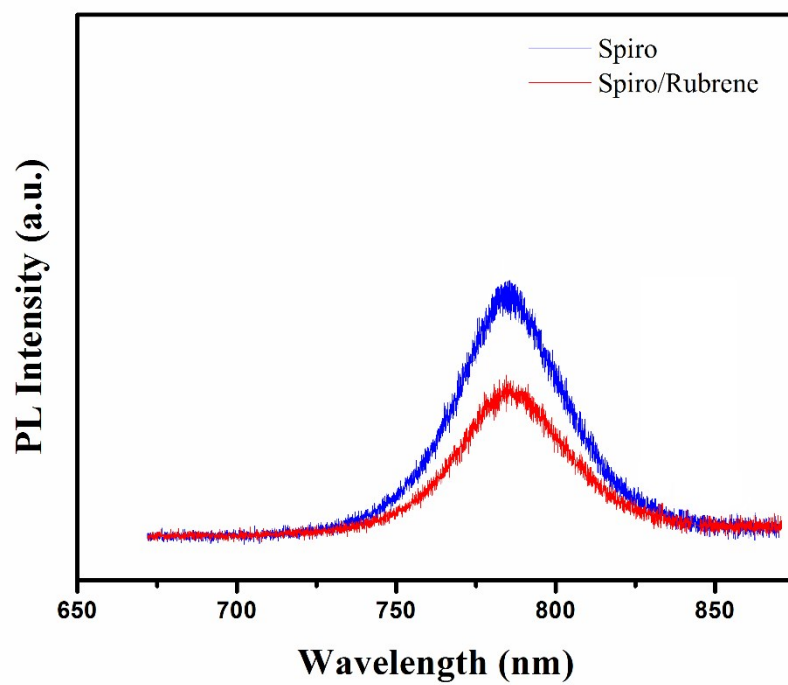

**Figure S4.** Photoluminescence spectra of perovskite films deposited on glass with spiro and rubrene/spiro HTLs.
